# Supplementary material for: Streptomyces Spinosus Sp. Nov. And Streptomyces Shenzenensis Subsp. Endophyticus Subsp. Nov. Endophytic Actinobacteria Isolated From Jasmine Rice and Their Genome Mining Correlate With Potential as Antibiotic Producers and Plant Growth Promoters
Source: Research Square preprint supplement (doi:10.21203/rs.3.rs-1200349/v1), 2022-01-20
Supplement: Supplementary file 1 [file 245d63b5d30632599705e72d.docx]

**Supplementary Table** S1. Whole-cell fatty acid composition (%) of strains SBTS01T and W18L9T and related species of *Streptomyces.*

Strain: 1, *Streptomyces spinosus* SBTS01T; 2, *Streptomyces rochei* NRRL B-2410T; 3, *Streptomyces naganishii* NRRL ISP-5282T; 4, *Streptomyces shenzhenensis* subsp. *endophyticus* W18L9T; 5, *Streptomyces shenzhenensis* DSM 42034T; 6, *Streptomyces* *graminisoli*  NBRC 108883T; 7, *Streptomyces* *jiujiangensis*DSM 42115T; 8, *Streptomyces hyaluromycini* DSM 100105T . Only fatty acids detected at more than 0.1 % of the total are presented. -, not detected. All the data are from this study.

| **Fatty acids** | **1.** | **2.** | **3.** | **4.** | **5.** | **6.** | **7.** | **8.** |
| --- | --- | --- | --- | --- | --- | --- | --- | --- |
| C12:0 | 0.1 | 0.4 | - | 0.15 | 0.1 | - | 0.8 | - |
| *iso*-C13:0 | 0.1 | - | - | - | - | - | - | - |
| *anteiso*-C13:0 | 0.12 | - | - | - | 0.1 | - | - | - |
| *iso*-C14:0 | 2.4 | 1.1 | 4.0 | 1.6 | 1.6 | 1.2 | 0.9 | 1.3 |
| C14:0 | 0.2 | 0.2 | 0.1 | 0.2 | 0.2 | 0.6 | 0.8 | 0.4 |
| *iso* G-C15:1 | 0.1 | 0.3 | 0.2 | 0.2 | 0.1 | 0.7 | 2.8 | 0.3 |
| *anteiso* A-C15:1 | - | 0.1 | - | - | - | - | - | - |
| *iso*-C15:0 | 9.3 | 8.6 | 7.9 | 7.7 | 5.3 | 14.4 | 8.2 | 8.1 |
| *anteiso*-C15:0 | 26.6 | 32.5 | 26.5 | 21.8 | 24.6 | 25.9 | 14.8 | 21.6 |
| C15:1 *w8c* | 0.1 | 0.3 | 0.2 | 0.2 | 0.1 | 1.0 | 3.1 | 0.2 |
| C15:1 *w6c* | 0.3 | 1.1 | 1.0 | 0.7 | 0.5 | - | - | 1.0 |
| *iso*-C14:0 3OH | - | - | 0.1 | 0.1 | 0.1 | 0.6 | 2.9 | 0.2 |
| C16:1 w7c alcohol | - | - | - | - | - | - | 1.8 | - |
| iso-G-C16:1 | - | - | - | - | - | - | 1.1 | - |
| C15:0 N alcohol | - | - | - | - | - | - | 0.6 | - |
| *iso*-H-C16:1 | 1.6 | 1.0 | 2.2 | 3.9 | 4.5 | - | - | 2.2 |
| *iso*-C16:0 | 19.4 | 12.6 | 21.4 | 18.5 | 21.7 | 5.6 | 4.1 | 13.0 |
| C16:1 *w11c* | - | - | - | - | - | 0.7 | - | - |
| *anteiso*-C16:0 | - | - | - | - | - | - | 1.0 | - |
| C16:1 *w5c* | - | - | - | - | - | - | 0.5 | - |
| C16:0 | 4.3 | 5.7 | 2.8 | 3.7 | 2.6 | 13.8 | 10.9 | 9.8 |
| *anteiso* A-C17:1 | - | - | - | - | - | - | 1.2 | - |
| *anteiso*-C17:1 *w9c* | 3.4 | 1.4 | 3.1 | 5.0 | 5.8 | 0.7 | - | 4.1 |
| *iso*-C17:0 | 6.1 | 6.0 | 5.3 | 6.0 | 3.6 | 9.4 | 6.7 | 6.4 |
| *anteiso*-C17:0 | 19.1 | 14.3 | 17.3 | 20.9 | 21.1 | 15.5 | 7.8 | 18.3 |
| C17:1 *w8c* | 0.1 | 0.4 | 0.3 | 0.6 | 0.5 | - | 0.8 | 0.7 |
| C17:0 cyclo | 0.5 | 0.4 | - | 0.6 | 0.5 | - | - | 0.7 |
| C17:0 | 0.2 | 0.6 | 0.2 | 0.6 | 0.4 | 1.9 | 1.4 | 0.8 |
| C16:1 2OH | 0.1 | 0.3 | 0.2 | 0.2 | 0.1 | 0.9 | 3.0 | 0.3 |
| *iso*-H C18:1 | 0.4 | 0.5 | 0.5 | 0.8 | 0.7 | 0.7 | 2.5 | 0.7 |
| C18:3 *w6c* | - | - | - | - | - | - | 0.9 | - |
| *iso*-C18:0 | - | 0.5 | 0.5 | 0.9 | 1.1 | - | - | 0.6 |
| C18:1 *w9c* | 0.3 | 0.6 | 0.5 | 0.40 | 0.3 | 1.6 | 4.5 | 1.4 |
| C18:0 | 0.3 | 1.4 | 0.2 | 0.3 | 0.1 | 1.8 | 3.7 | 1.7 |
| C17:0 2OH | - | - | - | - | - | 0.8 | - | - |
| C17:0 3OH | 0.1 | - | - | 0.1 | 0.1 | - | 1.2 | - |
| iso-H C15:1 | - | - | - | 0.3 | - | - | - | - |
| *iso*-C19:0 | - | 0.3 | - | - | - | - | 1.2 | - |
| *anteiso*-C19:0 | - | 0.5 | - | - | - | - | - | - |
| C19:0 | - | 0.3 | - | - | - | - | 1.0 | - |
| C20:4 *w6,9,12,15c* | - | - | - | - | - | - | 1.0 | - |
| C18:0 3OH | - | 4.6 | - | - | - | - | 1.7 | - |
| C20:1 *w9c* | - | 0.2 | - | - | - | - | - | - |
| *iso*-C20:0 | - | - | - | - | - | - | 1.9 | - |
| C12:0 aldehyde | - | - | - | - | - | - | 0.8 | - |
| C20:0 | - | 0.6 | - | - | - | - | - | - |
| C16:1 *w7c* | 1.2 | 0.9 | 2.0 | 1.29 | 1.5 | 0.5 | 1.2 | 2.6 |
| *iso* I-C17:1 | - | - | - | - | - | 0.5 | 1.9 | - |
| C18:1 *w7c* | 0.1 | 0.2 | - | 0.19 | 0.1 | - | 1.2 | 0.3 |
| C16:0 10-methyl | 2.7 | 2.2 | 3.6 | 3.3 | 2.7 | - | - | 3.5 |
