# Supplementary material for: Streptomyces Spinosus Sp. Nov. And Streptomyces Shenzenensis Subsp. Endophyticus Subsp. Nov. Endophytic Actinobacteria Isolated From Jasmine Rice and Their Genome Mining Correlate With Potential as Antibiotic Producers and Plant Growth Promoters
Source: Research Square preprint supplement (doi:10.21203/rs.3.rs-1200349/v1), 2022-01-20
Supplement: Supplementary file 2 [file 964b6a9efbd478c5244d1660.docx]

**Supplementary Table S4.** Genes encoding protein relating to antibiotics production, plant growth promoting, enzyme production and bioremediation of *Streptomyces spinosus* SBTS01T

|  |  |  |  |  |
| --- | --- | --- | --- | --- |
| **product** | **Span (nt)** | **Score** | **Percent similarity** | **Closest Match** |
| **Antibiotic production** |  |  |  |  |
| Isopenicillin N synthase family oxygenase | 304163-305188 | 1,827 | 99.7% | *Streptomyces* sp. jing01 |
| Isopenicillin N synthase family oxygenase | 39922-40221 | 535 | 99.0% | *Streptomyces* sp. jing01 |
| Isopenicillin N synthase family oxygenase | 40336-40884 | 946 | 99.4% | *Streptomyces* sp. jing01 |
| [Tetracenomycin](https://www.jbc.org/article/S0021-9258(20)73069-3/pdf)  family type II polyketide cyclase | 10733-11062 | 575 | 100.0% | *Streptomyces* sp. jing01 |
| [Tetracenomycin](https://www.jbc.org/article/S0021-9258(20)73069-3/pdf)  family type II polyketide cyclase | 233784-234113 | 569 | 100.0% | *Streptomyces* sp. jing01 |
| Enterotoxin | 52827-53948 | 1,673 | 87.3% | *Streptomyces longwoodensis* |
| **Drought tolerance** |  |  |  |  |
| Indole-3-glycerol phosphate synthase | 304526-305335 | 1,313 | 100.0% | *Streptomyces* sp. jing01 |
| L-ectoine synthase | 93957-94361 | 718 | 99.3% | *Streptomyces hygroscopicus* subsp*. jinggangensis* (strain 5008) |
| Ectoine dioxygenase | 94368-95261 | 1,516 | 97.0% | *Streptomyces hygroscopicus* subsp*. jinggangensis* (strain 5008) |
| Glycine betaine/  L-proline transporter *pro*P | 84958-86349 | 2,328 | 99.8% | *Streptomyces* sp. jing01 |
| Glycine betaine/  L-proline ABC transporter ATP-binding protein | 48790-49980 | 1,990 | 99.5% | *Streptomyces* sp. jing01 |
| Proline dehydrogenase | 234130-235056 | 1,549 | 99.4% | *Streptomyces* sp. jing01 |
| Sodium:solute symporter | 252230-253690 | 2,440 | 100.0% | *Streptomyces* sp. jing01 |
| Chloride channel protein | 53910-55706 | 2,406 | 81.3% | *Streptomyces* sp. P3 |
| Ionic transporter *y4h*A | 203388-204488 | 1,786 | 100.0% | *Streptomyces* sp. jing01 |
| Potassium channel family protein | 338642-339772 | 1,671 | 91.8% | *Streptomyces* sp. DSM 40868 |
| **Stress response** |  |  |  |  |
| Calcium homeostasis/redox stress adaptation protein | 54561-55136 | 980 | 100.0% | *Streptomyces* sp. jing01 |
| Asp23/Gls24 family envelope stress response protein | 55221-55691 | 771 | 100.0% | *Streptomyces* sp. jing01 |
| Chemical-damaging agent resistance protein C | 397654-398229 | 969 | 97.9% | *Streptomyces incarnatus* |
| Cold shock protein | 40990-41193 | 383 | 100.0% | *Streptomyces hygroscopicus* subsp*. jinggangensis* (strain 5008) |
| Cold shock protein | 63769-63972 | 383 | 100.0% | *Streptomyces* sp. CB01373 |
| Cold shock protein | 86675-86878 | 385 | 98.5% | *Streptomyces hygroscopicus* subsp*. jinggangensis* (strain 5008) |
| Cold shock protein | 239827-240030 | 380 | 100.0% | *Streptomyces* sp. Act143 |
| Cold shock protein | 268544-268747 | 381 | 100.0% | *Streptomyces hygroscopicus* subsp*. jinggangensis* (strain 5008) |
| Cold shock protein | 380867-381070 | 380 | 100.0% | *Streptomyces* sp. Act143 |
| Putative heat shock protein | 155170-155595 | 706 | 97.2% | *Streptomyces hygroscopicus* subsp*. jinggangensis* (strain 5008) |
| Heat shock protein | 221248-221712 | 753 | 97.4% | *Streptomyces* sp. NRRL B-3648 |
| Hsp70 family protein | 120078-121838 | 2,885 | 95.9% | *Streptomyces globosus* |
| HSP90 family protein | 163644-165482 | 3,138 | 99.8% | *Streptomyces* sp. jing01 |
| HSP90 family protein | 11297-114544 | 3,037 | 96.3% | *Streptomyces* sp. RLA2-12 |
| 10 kDa chaperonin | 221966-222274 | 507 | 100.0% | *Streptomyces luteoverticillatus* |
| 60 kDa chaperonin | 222393-224021 | 2,669 | 100.0% | *Streptomyces* sp. jing01 |
| Chaperone protein *Dna*J | 55120-56256 | 1,995 | 100.0% | *Streptomyces antibioticus* |
| Chaperone protein *Dna*K | 620121-622007 | 3,133 | 99.7% | *Streptomyces* sp. jing01 |
| Chaperone protein *Clp*B | 213655-216252 | 4,214 | 97.7% | *Streptomyces hygroscopicus* subsp*. jinggangensis* (strain 5008) |
| Chaperone protein *Dna*J | 221718-222887 | 2,029 | 99.2% | *Streptomyces hygroscopicus* subsp*. jinggangensis* (strain 5008) |
| Chaperone protein *Dna*K | 223580-225424 | 3,040 | 98.5% | *Streptomyces* sp. Z022 |
| 60 kDa chaperonin | 378945-380567 | 2,628 | 100.0% | *Streptomyces hygroscopicus* subsp*. jinggangensis* (strain 5008) |
| Chaperone protein *Htp*G | 150011-151921 | 3,203 | 97.3% | *Streptomyces hygroscopicus* subsp*. jinggangensis* (strain 5008) |
| Universal stress protein | 114454-114933 | 806 | 100.0% | *Streptomyces* sp. jing01 |
| Universal stress protein | 32371-33261 | 1,457 | 98.0% | *Streptomyces* sp. jing01 |
| Universal stress protein | 131930-132832 | 1,524 | 99.7% | *Streptomyces* sp. jing01 |
| Universal stress protein | 268421-269287 | 1,451 | 99.7% | *Streptomyces* sp. jing01 |
| Universal stress protein | 148647-149600 | 1,269 | 85.1% | *Streptomyces* sp. SID161 |
| Universal stress protein | 13103-13978 | 1,216 | 81.5% | *Streptomyces* sp. AS58 |
| Universal stress protein | 127292-128167 | 1,333 | 90.0% | *Streptomyces* sp. jing01 |
| Universal stress protein | 134686-135564 | 1,429 | 93.1% | *Streptomyces* sp. jing01 |
| Stress-inducible protein | 147716-148621 | 1,413 | 91.0% | *Streptomyces* sp. AS58 |
| Stress-inducible protein | 7727-8641 | 1,171 | 80.2% | *Streptomyces hygroscopicus* subsp*. jinggangensis* (strain 5008) |
| Stress-inducible protein | 8668-9573 | 1,325 | 87.0% | *Streptomyces* sp. AS58 |
| Stress-inducible protein | 12325-12768 | 679 | 90.5% | *Streptomyces hygroscopicus* subsp*. jinggangensis* (strain 5008) |
| **Lipase** |  |  |  |  |
| Lipase | 53987-54796 | 1,309 | 93.7% | *Streptomyces* sp. NRRL B-3648 |
| Putative esterase/lipase | 400622-401353 | 1,210 | 96.7% | *Streptomyces hygroscopicus* subsp*. jinggangensis* (strain 5008) |
| **Protease** |  |  |  |  |
| Extracellular small neutral protease | 134407-135096 | 1,121 | 95.2% | *Streptomyces hygroscopicus* subsp*. jinggangensis* (strain 5008) |
| M6 family metalloprotease domain-containing protein | 121883-124240 | 4,210 | 99.9% | *Streptomyces* sp. jing01 |
| M48 family metalloprotease | 161778-163475 | 2,128 | 97.8% | *Streptomyces* sp. jing01 |
| M56 family metallopeptidase | 163512-164459 | 1,587 | 99.7% | *Streptomyces* sp. jing01 |
| | Neutral  metalloproteinase |  | | --- | --- | | 79641-80723 | 1,831 | 96.9% | *Streptomyces hygroscopicus* subsp*. jinggangensis* (strain 5008) |
| Zinc metalloprotease | 6449-7615 | 1,624 | 85.4% | *Streptomyces hygroscopicus* subsp*. jinggangensis* (strain 5008) |
| Putative M48-family peptidase | 346425-347318 | 1,364 | 95.6% | *Streptomyces hygroscopicus* subsp*. jinggangensis* (strain 5008) |
| Peptidase M48 domain-containing protein | 111947-114901 | 2,257 | 49.5% | *Streptomyces lydicus* |
| Peptidase M48 domain-containing protein | 18466-19548 | 1,782 | 96.7% | *Streptomyces hygroscopicus* subsp*. jinggangensis* (strain 5008) |
| Peptidase S1 | 6423-7601 | 1,865 | 91.1% | *Streptomyces bungoensis* |
| Peptidase C56 PfpI | 62915-63481 | 928 | 95.7% | *Streptomyces* sp. 1-11 |
| Putative prolyl aminopeptidase | 236610-237911 | 2,211 | 96.3% | *Streptomyces hygroscopicus* subsp*. jinggangensis* (strain 5008) |
| Protease HtpX homolog | 223072-223992 | 1,510 | 100.0% | *Streptomyces* sp. jing01 |
| Site-2 protease family protein | 56514-57815 | 2,230 | 99.5% | *Streptomyces* sp. jing01 |
| Site-2 protease family protein | 153096-153896 | 1,389 | 98.9% | *Streptomyces* sp. jing01 |
| MarP family serine protease | 244416-245600 | 1,960 | 100.0% | *Streptomyces* sp. jing01 |
| Insulinase family protein | 6304-7683 | 2,354 | 100.0% | *Streptomyces* sp. jing01 |
| Tricorn protease homolog | 59255-62524 | 5,459 | 96.3% | *Streptomyces hygroscopicus* subsp*. jinggangensis* (strain 5008) |
| Hydrogenase maturation protease | 14079-14582 | 647 | 81.6% | *Streptomyces monashensis* |
| **Chitinase** |  |  |  |  |
| Chitinase | 71713-73521 | 3,157 | 99.5% | *Streptomyces* sp. jing01 |
| Chitinase | 100296-101339 | 1,823 | 99.4% | *Streptomyces* sp. jing01 |
| Chitinase | 207611-209329 | 2,957 | 100.0% | *Streptomyces* sp. jing01 |
| Chitinase | 339161-340984 | 3,271 | 99.8% | *Streptomyces* sp. jing01 |
| **Polysaccharide degradation** |  |  |  |  |
| Maltose alpha-D-glucosyltransferase | 304861-305262 | 695 | 99.2% | *Streptomyces hygroscopicus* subsp*. jinggangensis* (strain 5008) |
| Alpha-amylase | 196608-197984 | 2,353 | 98.4% | *Streptomyces hygroscopicus* subsp*. jinggangensis* (strain 5008) |
| Secreted cellulose binding protein | 99453-100541 | 1,895 | 95.9% | *Streptomyces hygroscopicus* subsp*. jinggangensis* (strain 5008) |
| Glycoside hydrolase family 18 protein | 55721-56953 | 2,204 | 99.3% | *Streptomyces* sp. jing01 |
| Cellulose-binding protein | 39025-39702 | 1,129 | 91.1% | *Streptomyces* sp. FBKL.4005 |
| Polysaccharide deacetylase family protein | 57784-58467 | 1,174 | 100.0% | *Streptomyces* sp. jing01 |
| Glycohydrolase | 30743-31750 | 1,682 | 93.7% | *Streptomyces hygroscopicus* subsp*. jinggangensis* (strain 5008) |
| **Xylanase** |  |  |  |  |
| Endo-1,4-beta-xylanase | 58537-59232 | 1,259 | 100.0% | *Streptomyces* sp. jing01 |
| Beta-xylanase | 59546-60631 | 1,903 | 98.9% | *Streptomyces* sp. jing01 |
| Beta-xylanase | 731010-732449 | 2,413 | 94.4% | *Streptomyces longwoodensis* |
| **Phosphatase** |  |  |  |  |
| Putative alkaline phosphatase | 116972-118612 | 2,838 | 96.5% | *Streptomyces hygroscopicus* subsp*. jinggangensis* (strain 5008) |
| Ppx/GppA family phosphatase | 291082-292089 | 1,724 | 100.0% | *Streptomyces* sp. jing01 |
| Histidine phosphatase family protein | 203657-204253 | 1,049 | 99.5% | *Streptomyces* sp. jing01 |
| Phosphatase | 249605-250402 | 1,376 | 99.6% | *Streptomyces* sp. jing01 |
| HAD family phosphatase | 1049-1906 | 1,458 | 100.0% | *Streptomyces* sp. jing01 |
| Phosphatase | 30862-31644 | 1,339 | 99.6% | *Streptomyces* sp. jing01 |
| Phosphatase | 395419-396021 | 987 | 93.4% | *Streptomyces hygroscopicus* subsp*. jinggangensis* (strain 5008) |
| Exopolyphosphatase | 12170-13102 | 1,525 | 97.4% | *Streptomyces hygroscopicus* subsp*. jinggangensis* (strain 5008) |
| Inorganic pyrophosphatase | 67420-67911 | 875 | 100.0% | *Streptomyces cyaneogriseus* |
| **Isomerase** |  |  |  |  |
| Sugar isomerase | 227819-228979 | 1,969 | 96.9% | *Streptomyces hygroscopicus* subsp*. jinggangensis* (strain 5008) |
| Xylose isomerase | 157492-158658 | 2,024 | 99.7% | *Streptomyces* sp. jing01 |
| **Xenobiotic degradation** |  |  |  |  |
| Aldehyde dehydrogenase family protein | 45698-47218 | 2,608 | 99.6% | *Streptomyces* sp. jing01 |
| Alpha/beta hydrolase | 130174-131022 | 1,475 | 98.9% | *Streptomyces* sp. jing01 |
| Alpha/beta hydrolase | 99827-100744 | 1,499 | 91.5% | *Streptomyces corchorusii* |
| Alpha/beta hydrolase | 27849-28712 | 1,498 | 100.0% | *Streptomyces* sp. jing01 |
| Aspartyl beta-hydroxylase | 739734-740558 | 1,413 | 100.0% | *Streptomyces* sp. jing01 |
| 2-nitropropane dioxygenase | 123769-124800 | 1,214 | 70.8% | *Streptomyces cattleya* (strain ATCC 35852) |
| Haloacid dehalogenase type II | 26763-27488 | 1,236 | 100.0% | *Streptomyces* sp. jing01 |
| **Ion detoxification** |  |  |  |  |
| Selenium-binding protein | 47983-49413 | 2,580 | 98.7% | *Streptomyces* sp. jing01 |
| Selenium-binding protein | 47983-49413 | 2,580 | 98.7% | *Streptomyces* sp. jing01 |
| Alpha/beta fold hydrolase | 50584-51291 | 1,213 | 94.0% | *Streptomyces* sp. SID161 |
| Tellurium resistance protein | 31898-32473 | 956 | 98.4% | *Streptomyces hygroscopicus* subsp*. jinggangensis* (strain 5008) |
| *Ter*D family protein | 55249-55827 | 1,001 | 100.0% | *Streptomyces* sp. jing01 |
| **Arsenate reduction** |  |  |  |  |
| Mycoredoxin | 154584-154826 | 448 | 100.0% | *Streptomyces* sp. jing01 |
| **Antioxidant** |  |  |  |  |
| Glutathione peroxidase | 247153-247659 | 863 | 98.8% | *Streptomyces* sp. jing01 |
| Glutathione-independent formaldehyde dehydrogenase | 284419-285597 | 2,005 | 99.5% | *Streptomyces* sp. jing01 |
| Lactoylglutathione lyase | 60689-61135 | 740 | Ident.: 95.3% | *Streptomyces hygroscopicus* subsp*. jinggangensis* (strain 5008) |
| Glutathione peroxidase | 247153-247659 | 855 | 98.2% | *Streptomyces hygroscopicus* subsp*. jinggangensis* (strain 5008) |
| **Others** |  |  |  |  |
| Squalene-hopene cyclase | 9402-11432 | 3,594 | 97.6% | *Streptomyces hygroscopicus* subsp*. jinggangensis* (strain 5008) |
| Squalene-hopene cyclase | 9402-11432 | 3,594 | 97.6% | *Streptomyces hygroscopicus* subsp*. jinggangensis* (strain 5008) |
| Gamma-glutamyl transferase | 279589-281409 | 3,137 | 97.0% | *Streptomyces hygroscopicus* subsp*. jinggangensis* (strain 5008) |
| Gamma-glutamyltranspeptidase | 298790-300592 | 2,984 | 97.8% | *Streptomyces hygroscopicus* subsp*. jinggangensis* (strain 5008) |
| Luciferase-type oxidoreductase, BA3436 family | 60232-61284 | 1,742 | 95.1% | *Streptomyces* sp. Ag109_O5-10 |
